# Supplementary material
Source: PubMed Central journal article supplement (PMC2367398)

Supplemental Fig. 1 Sato et al.

A

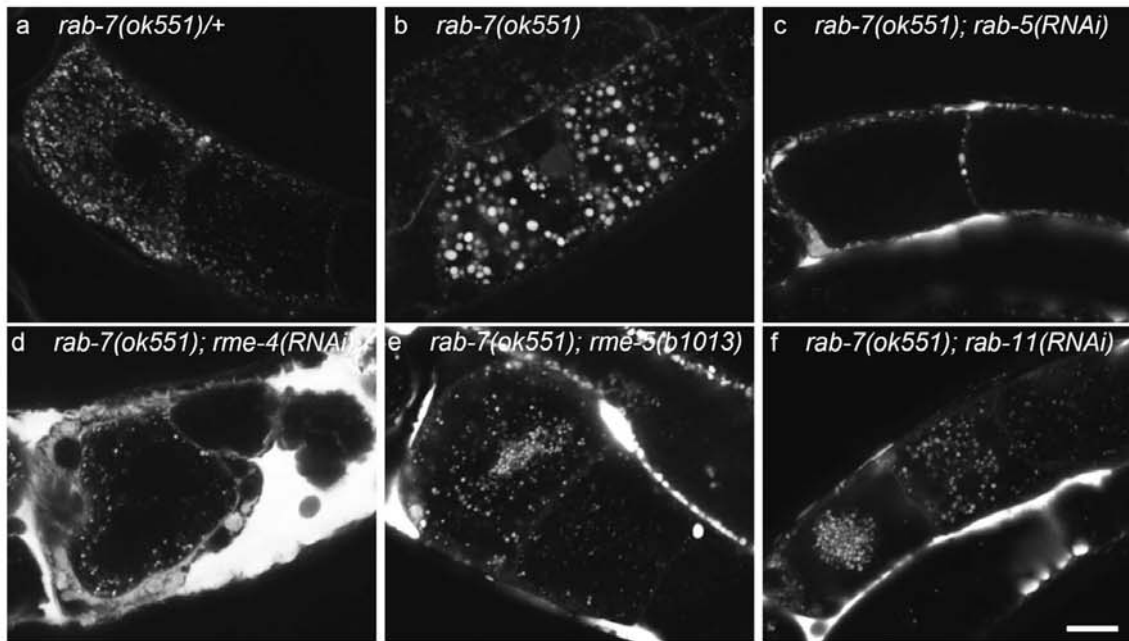

B

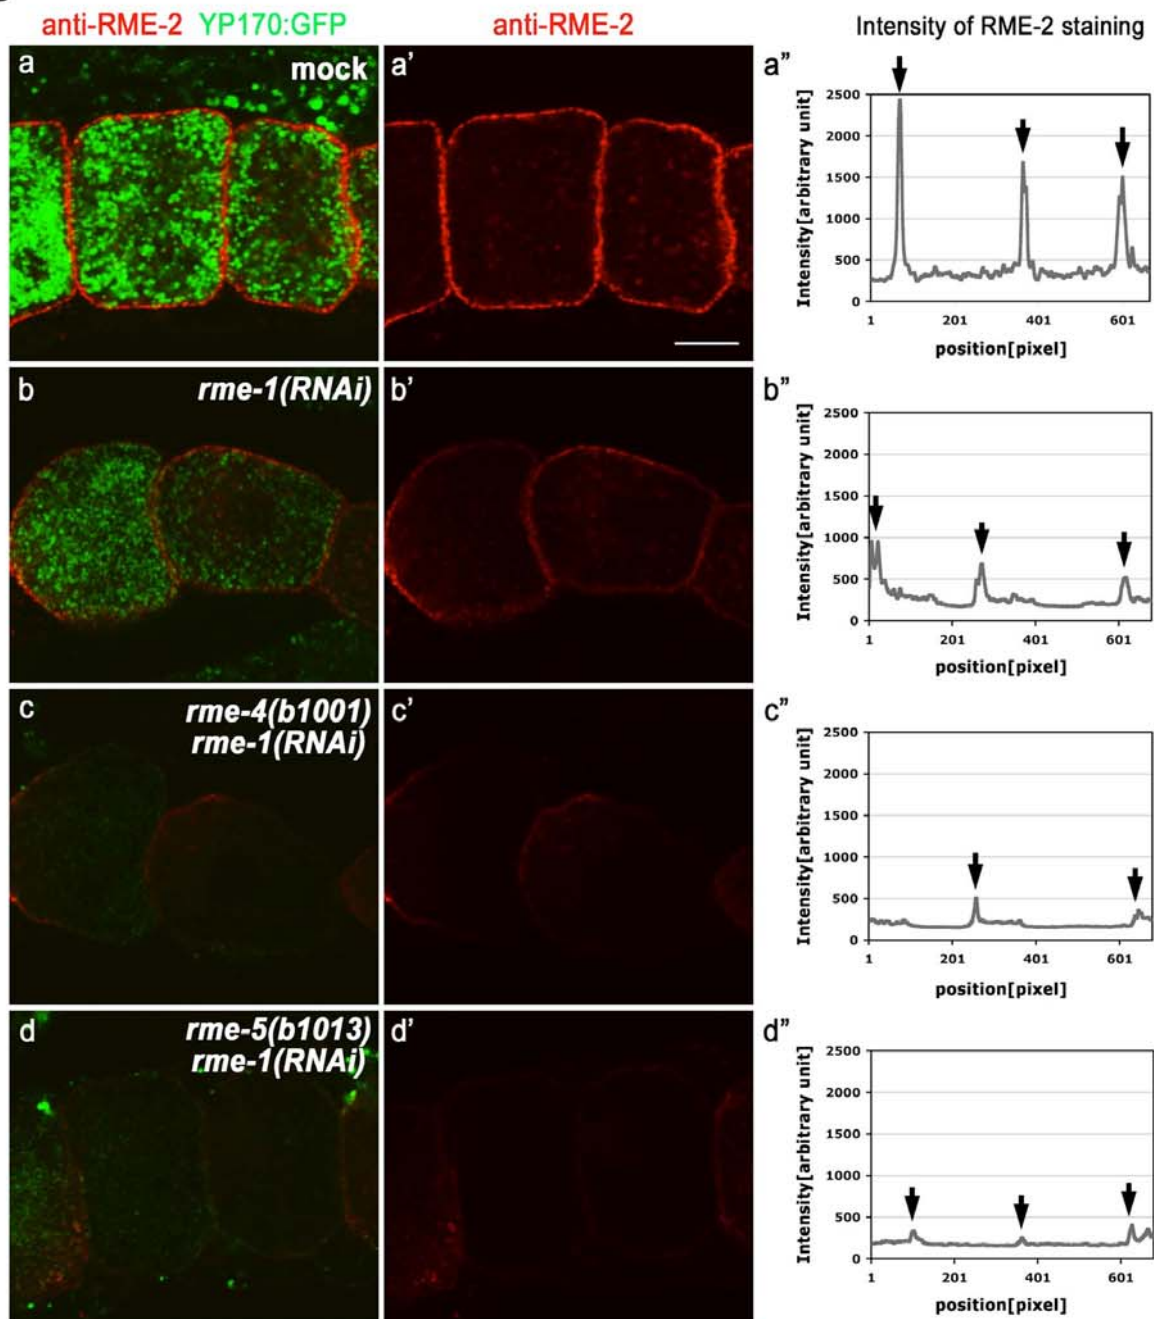

Supplement: emboj200854s1.pdf [file emboj200854s1.pdf]

Supplemental Fig. 2 Sato et al.

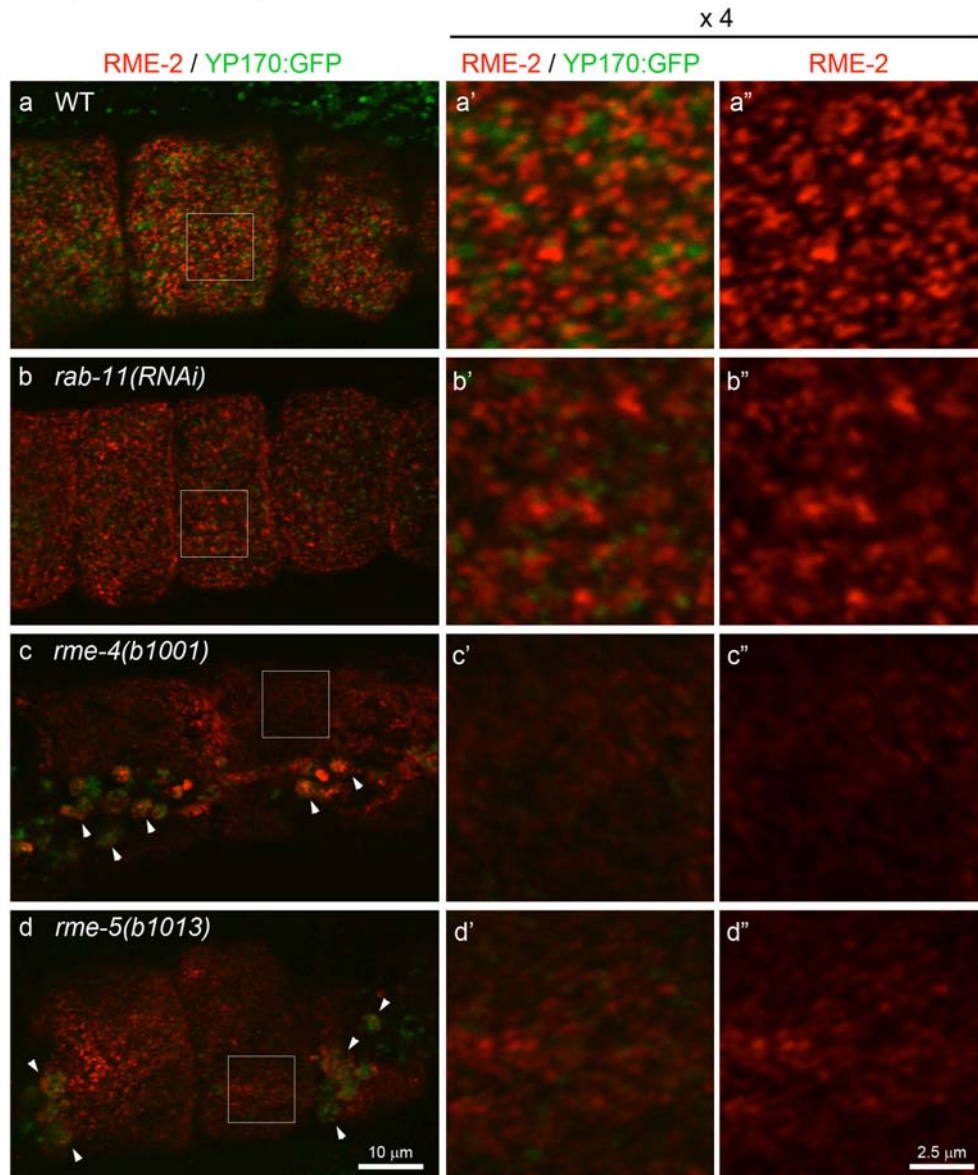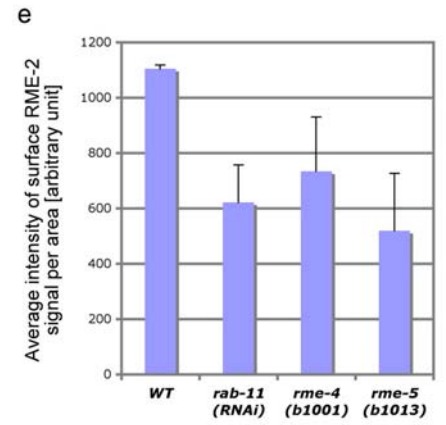

Supplement: emboj200854s2.pdf [file emboj200854s2.pdf]

Supplemental Fig. 3 Sato et al.

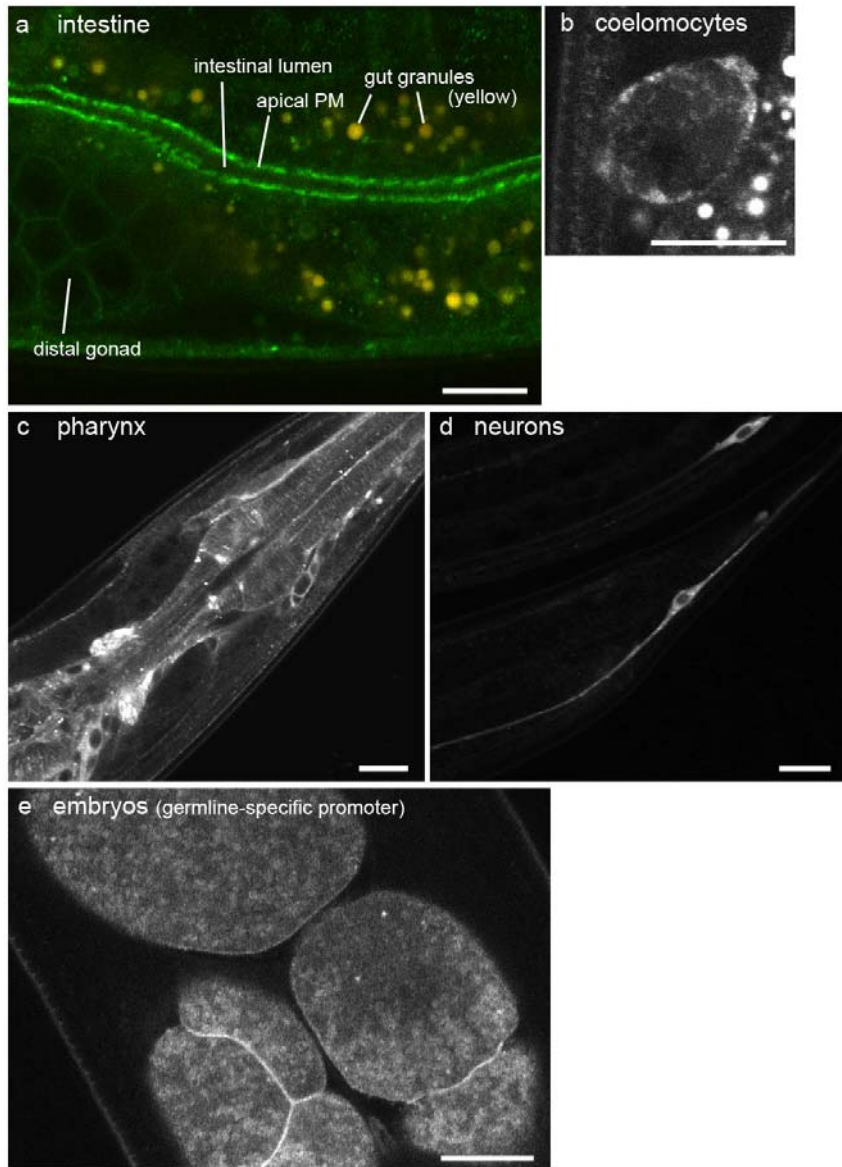

Supplement: emboj200854s3.pdf [file emboj200854s3.pdf]

**A**

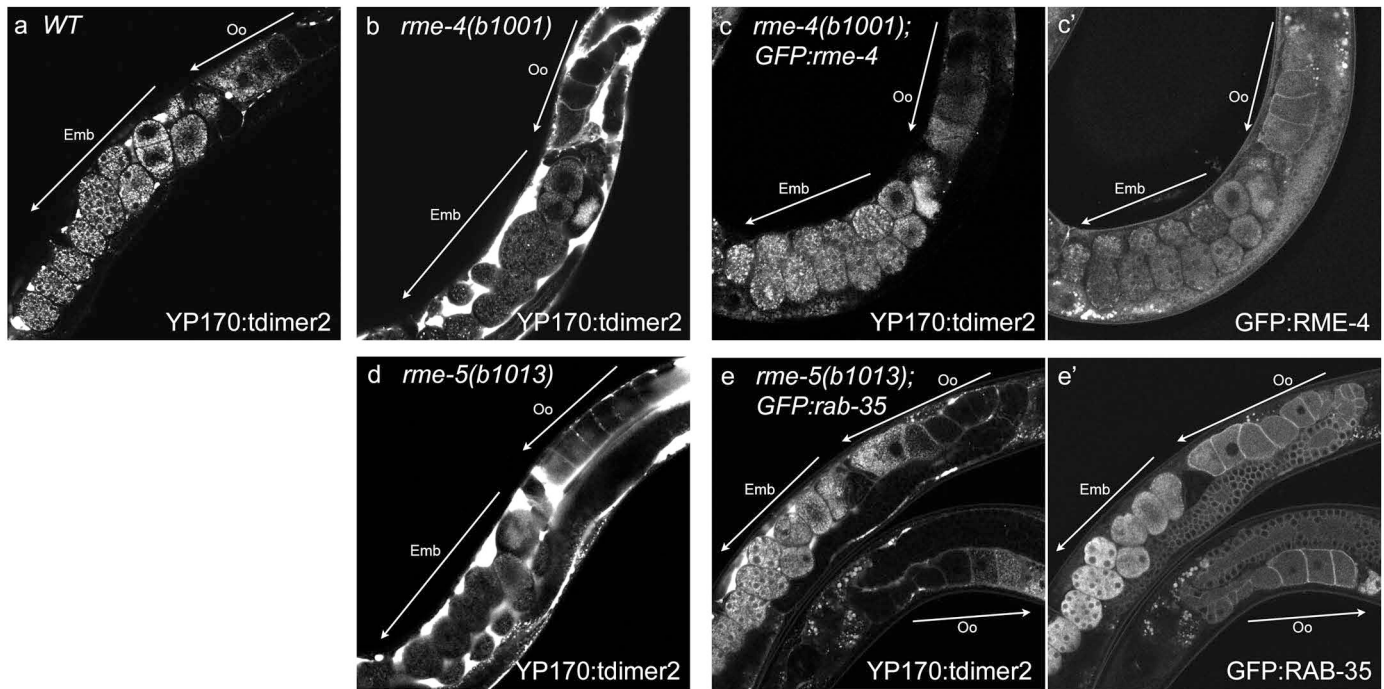

**B**

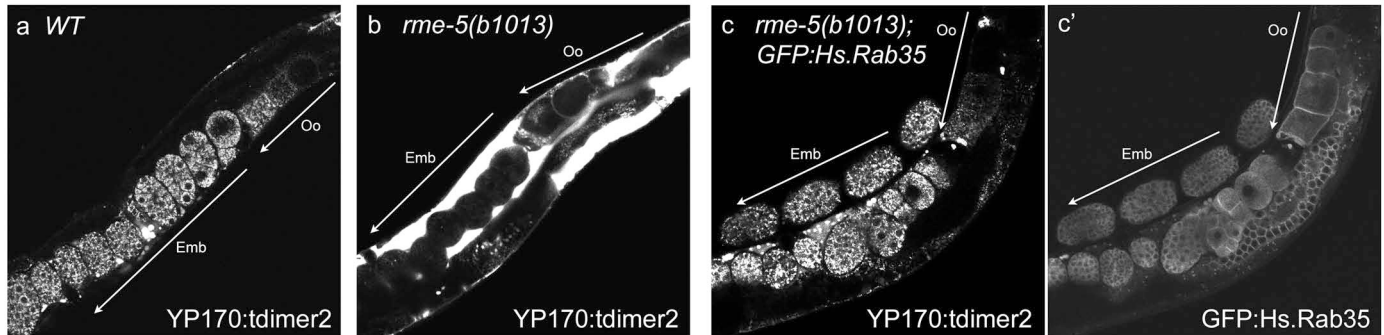

**C**

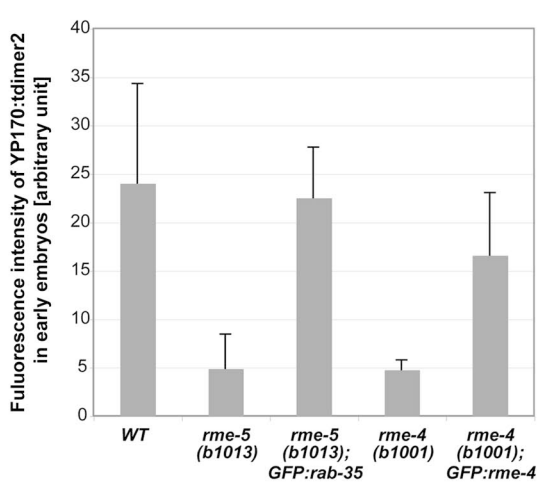

**D**

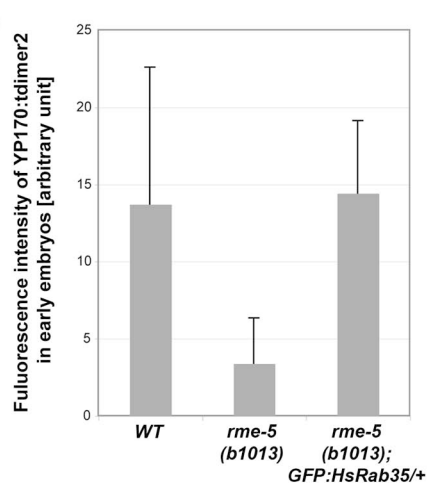

Supplement: emboj200854s4.pdf [file emboj200854s4.pdf]

Supplemental Fig. 5 Sato et al.

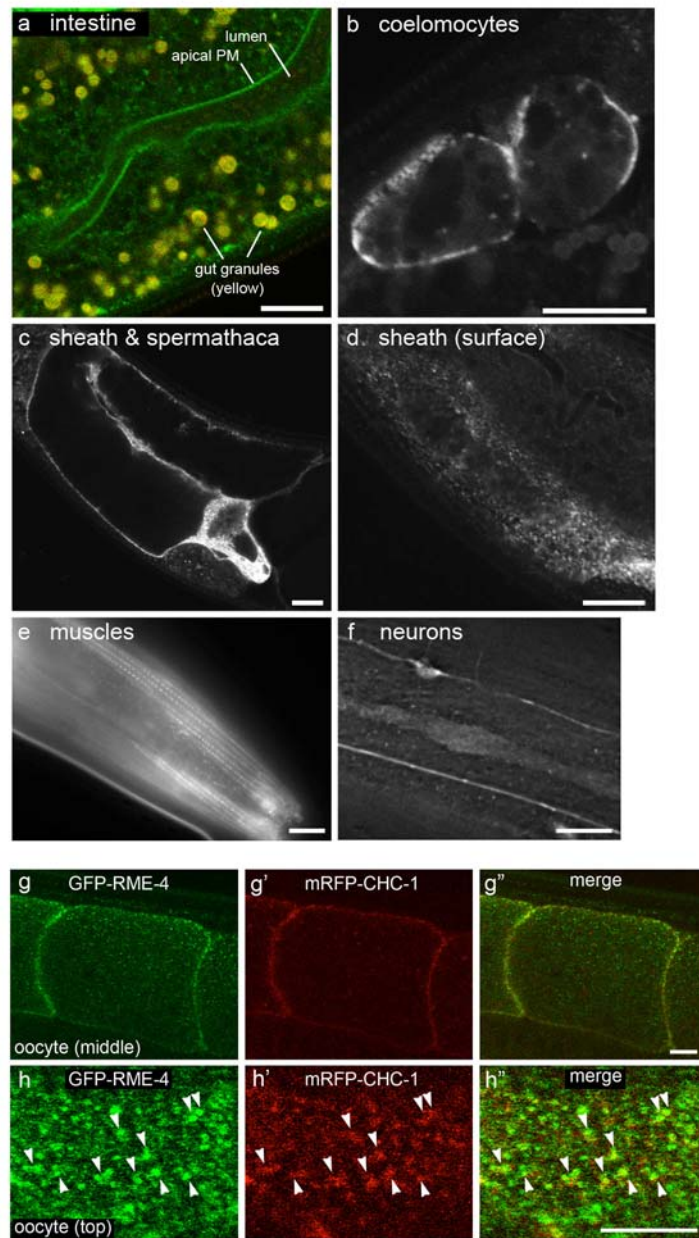

Supplement: emboj200854s5.pdf [file emboj200854s5.pdf]
